# Supplementary material for: Carrier-free nanodrugs for in vivo NIR bioimaging and chemo-photothermal synergistic therapy
Source: Royal Society of Chemistry journal article supplement (doi:10.1039/c9tb00687g), 2019-01-01

## **Electronic Supplementary Information**

### **Carrier-Free Nanodrugs for In-Vivo NIR Bioimaging and Chemo-Photothermal Synergistic Therapy**

Juanfang Lin <sup>1</sup>, Chao Li <sup>1</sup>, Yan Guo <sup>1</sup>, Junjie Zou <sup>1</sup>, Pengyu Wu <sup>1</sup>, Yuqin Liao <sup>1</sup>, Bingchen Zhang <sup>1</sup>, Jingqing Le <sup>1</sup>, Ruirui Zhao <sup>1</sup>, Jing-Wei Shao <sup>1,2,\*</sup>

**Affiliations:** 1. Fujian Provincial Key Laboratory of Cancer Metastasis Chemoprevention and Chemotherapy, College of Chemistry, Fuzhou University, Fuzhou, 350116, China.

2. Marine Drug R&D Center, Institute of Oceanography, Minjiang University, Fuzhou, 350108, China.

**\* Corresponding author:** Jing-Wei Shao

**E-mail addresses:** shaojingwei@fzu.edu.cn (J.-W. Shao)

**Table S1.** Size and PDI of single PTX with different concentrations.

**Fig. S1.** The Tyndall effect of different ratio of PTX to ICG (1:5, 1:1, 5:1, 10:1).

**Fig. S2.** Size distribution of different ratio of PTX to ICG (1:1, 5:1, 10:1).

**Fig. S3.** Photos of solution turbidity of PTX, PTX NDs, PTX+ICG mixture, free ICG and PTX/ICG NDs (all above solution was dispersed in ddH<sub>2</sub>O).

**Fig. S4.** Size distribution and zeta potential of PTX/ICG NDs during 30 days.

**Fig. S5.** The size changing of PTX/ICG NDs in DMEM cell culture medium containing 10% FBS over 24 h.

**Fig. S6.** pH induced size change of PTX/ICG NDs in time followed by DLS. (A) pH 5.5; (B) pH 7.4.

**Fig. S7.** (A) Standard line of ICG in pharmacokinetic study; (B) Plasma ICG concentration of free ICG and PTX/ICG NDs after intravenous injection determined based on UV absorption spectra in the blood lysates.

**Table S1.** Size and PDI of single PTX with different concentrations

| Concentration ( $\mu\text{M}$ ) | Size (nm)        | PDI               |
|---------------------------------|------------------|-------------------|
| 1260                            | $2774 \pm 608$   | $0.183 \pm 0.001$ |
| 680                             | $11910 \pm 2140$ | 1.000             |
| 320                             | $3579 \pm 443$   | $0.918 \pm 0.015$ |
| 160                             | $4322 \pm 640$   | $0.596 \pm 0.353$ |
| 80                              | $5262 \pm 1292$  | $0.681 \pm 0.244$ |
| 40                              | $1888 \pm 286$   | 1.000             |
| 20                              | $4137 \pm 1549$  | 1.000             |
| 10                              | $3311 \pm 158$   | $0.875 \pm 0.14$  |

**Fig. S1.**

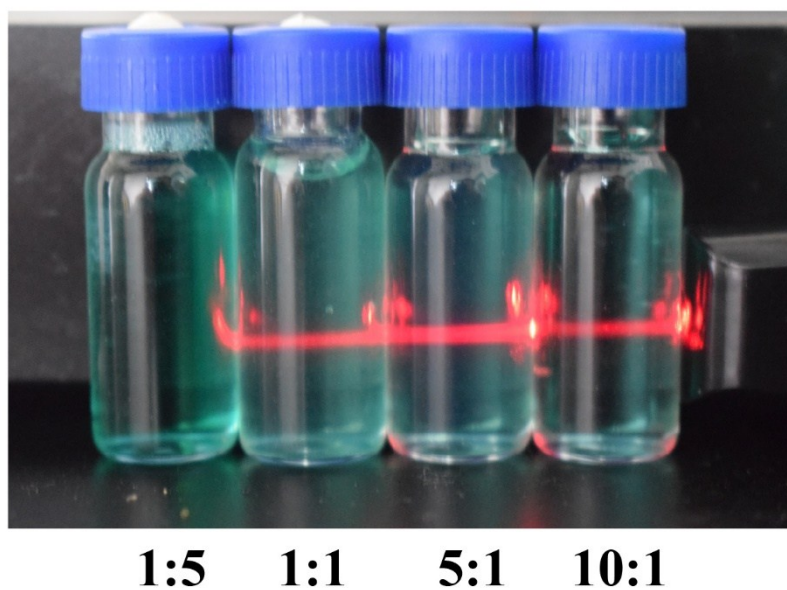

**Fig. S2.**

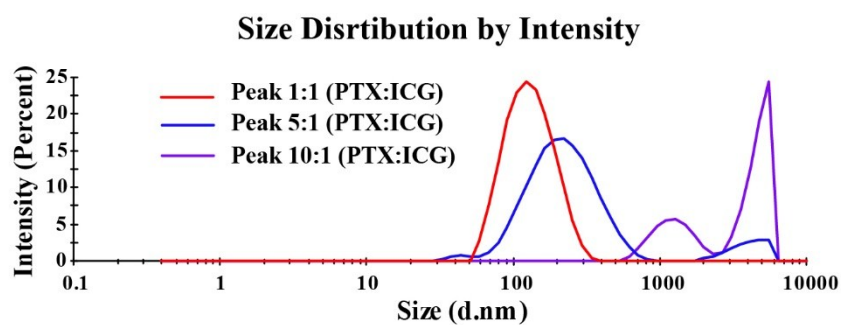

Fig. S3.

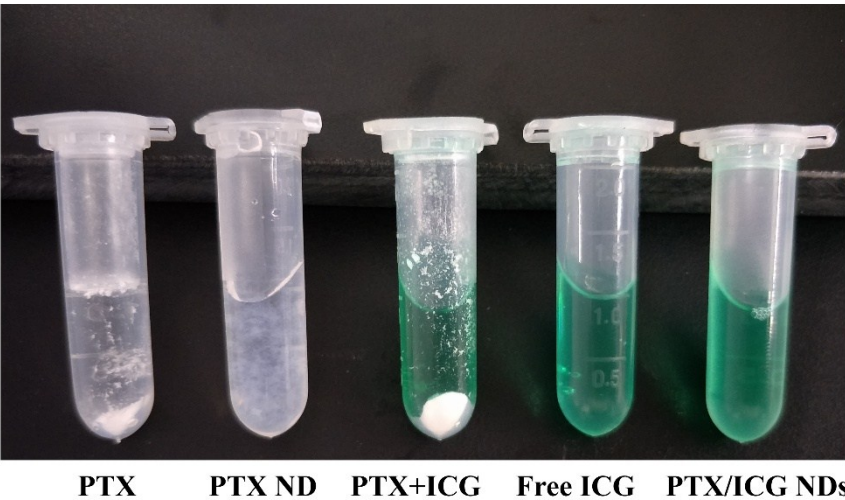

Fig. S4.

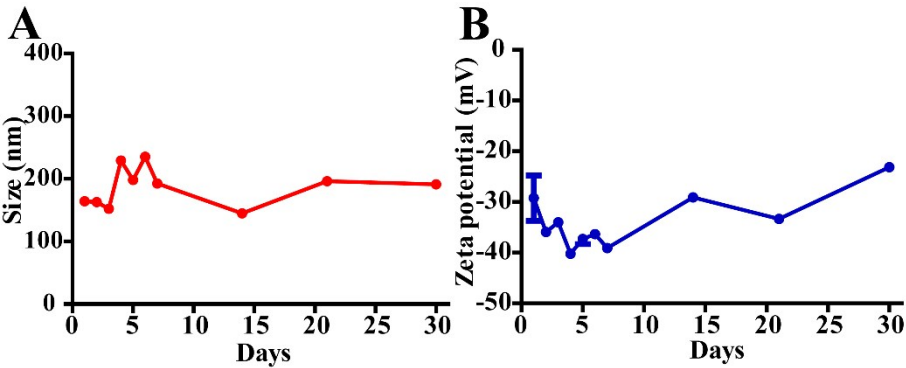

Fig. S5.

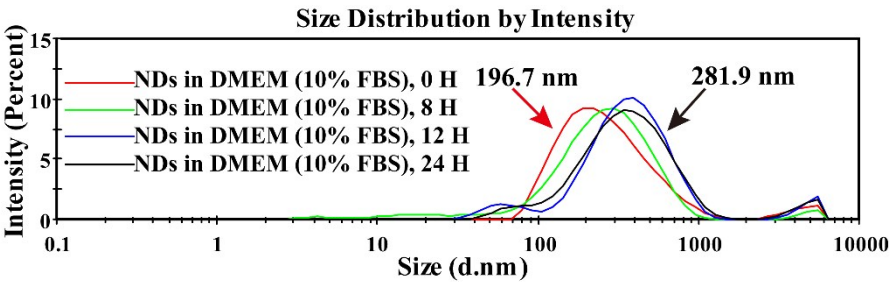

Fig. S6.

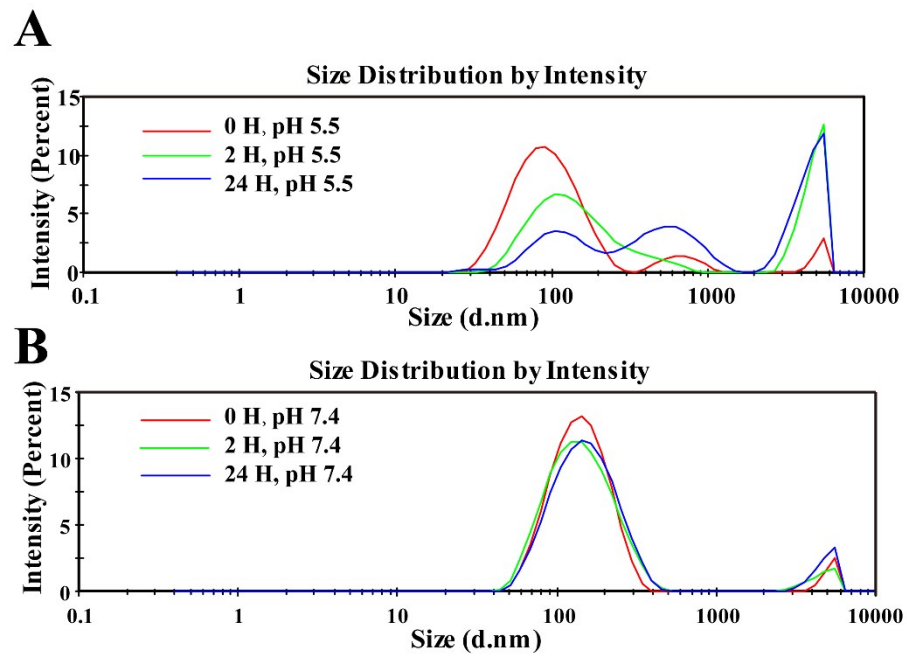

Fig. S7.

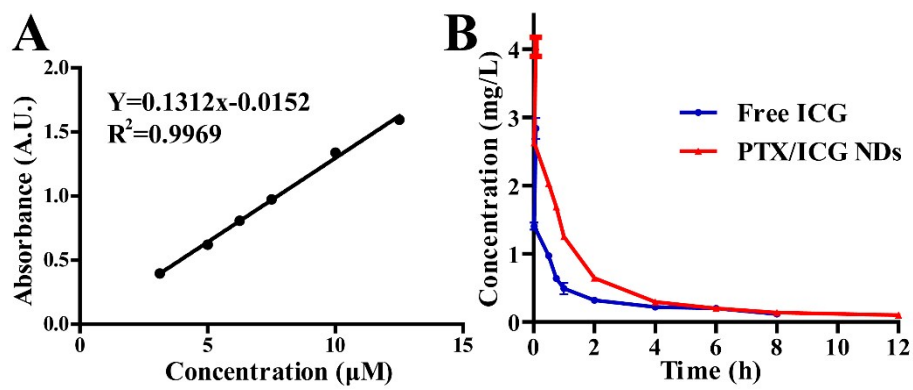

Supplement: c9tb00687g1.pdf [file c9tb00687g1.pdf]
